# Supplementary material
Source: publisher figshare collection journal article supplement (https://frontiersin.figshare.com/ndownloader/files/24838898)
Supplement: Supplementary file [file 24838898]

## Supplementary Material

### 1 Confirmatory Factor Analyses: Factor Loadings and Residual Variances

*Table S1: Standardized Factor Loadings and Residual Variances for the Chosen Measurement Models for Achievement Goal Orientations in Mathematics and English*

| Item              | Factor loadings                |                                |                                   |                                    |                    | Residual variances<br>M / E |
|-------------------|--------------------------------|--------------------------------|-----------------------------------|------------------------------------|--------------------|-----------------------------|
|                   | Mastery-<br>intrinsic<br>M / E | Mastery-<br>extrinsic<br>M / E | Performance-<br>approach<br>M / E | Performance-<br>avoidance<br>M / E | Avoidance<br>M / E |                             |
| MI1               | .853 / .810                    |                                |                                   |                                    |                    | .272 / .344                 |
| MI2               | .869 / .881                    |                                |                                   |                                    |                    | .245 / .225                 |
| MI3               | .887 / .806                    |                                |                                   |                                    |                    | .214 / .351                 |
| ME1               |                                | .855 / .776                    |                                   |                                    |                    | .269 / .398                 |
| ME2               |                                | .890 / .810                    |                                   |                                    |                    | .208 / .343                 |
| ME3               |                                | .883 / .855                    |                                   |                                    |                    | .220 / .269                 |
| PAP1              |                                |                                | .680 / .659                       |                                    |                    | .538 / .566                 |
| PAP2              |                                |                                | .633 / .680                       |                                    |                    | .600 / .537                 |
| PAP3              |                                |                                | .782 / .729                       |                                    |                    | .389 / .469                 |
| PAV1 <sup>1</sup> |                                |                                |                                   | .580 / .576                        |                    | .663 / .668                 |
| PAV2 <sup>1</sup> |                                |                                |                                   | .610 / .636                        |                    | .627 / .595                 |
| PAV3              |                                |                                |                                   | .924 / .944                        |                    | .146 / .109                 |
| AV1               |                                |                                |                                   |                                    | .524 / .533        | .725 / .716                 |
| AV2               |                                |                                |                                   |                                    | .823 / .893        | .322 / .203                 |
| AV3               |                                |                                |                                   |                                    | .698 / .617        | .513 / .619                 |

*Note.* M = math; E = English; MI = mastery-intrinsic orientation; ME = mastery-extrinsic orientation; PAP = performance-approach orientation; PAV = performance-avoidance orientation; AV = avoidance orientation. For math and English, error covariances between one pair of similarly worded items were freed: <sup>1</sup> Items PAV1 “I try to avoid situations in which I may appear dumb or incompetent” and PAV2 “I try to avoid situations in which I may fail or make mistakes”.

*Table S2: Standardized Factor Loadings and Residual Variances for the Chosen Measurement Models for Perceived Cost in Mathematics and English*

| Item              | Factor loadings             |                            |                              |                                |
|-------------------|-----------------------------|----------------------------|------------------------------|--------------------------------|
|                   | Effort<br>required<br>M / E | Emotional<br>cost<br>M / E | Opportunity<br>cost<br>M / E | Residual<br>variances<br>M / E |
| EFF1              | .725 / .771                 |                            |                              | .474 / .406                    |
| EFF2              | .872 / .866                 |                            |                              | .240 / .250                    |
| EFF3 <sup>1</sup> | – / .869                    |                            |                              | – / .245                       |
| EMO1              |                             | .686 / .555                |                              | .530 / .692                    |
| EMO2              |                             | .883 / .879                |                              | .221 / .227                    |
| EMO3              |                             | .834 / .828                |                              | .304 / .315                    |
| OPP1 <sup>2</sup> |                             |                            | .583 / .618                  | .660 / .619                    |
| OPP2 <sup>2</sup> |                             |                            | .723 / .766                  | .478 / .412                    |
| OPP3              |                             |                            | .842 / .827                  | .291 / .317                    |

*Note.* M = math; E = English; EFF = effort required; EMO = emotional cost; OPP = opportunity cost.

For math, one item<sup>1</sup> (EFF3 “Learning mathematics exhausts me”) was excluded and, for math and English, error covariances between one pair of similarly worded items were freed: <sup>2</sup> Items OPP1 “I have to give up other activities that I like to be successful at math/English” and OPP2 “I have to give up a lot to do well in math/English”.

*Table S3: Standardized Factor Loadings and Residual Variances for the Chosen Measurement Model for Academic Well-Being*

| Item              | Factor loadings |            |          |            | Residual variances |
|-------------------|-----------------|------------|----------|------------|--------------------|
|                   | Engagement      | Exhaustion | Cynicism | Inadequacy |                    |
| ENG1 <sup>1</sup> | .769            |            |          |            | .409               |
| ENG2 <sup>1</sup> | .731            |            |          |            | .465               |
| ENG3              | .736            |            |          |            | .458               |
| ENG4              | .853            |            |          |            | .273               |
| ENG5              | .862            |            |          |            | .256               |
| ENG6              | .623            |            |          |            | .612               |
| ENG7              | .808            |            |          |            | .348               |
| ENG8              | .691            |            |          |            | .523               |
| ENG9              | .722            |            |          |            | .479               |
| EXH1              |                 | .570       |          |            | .675               |
| EXH2              |                 | .726       |          |            | .473               |
| EXH3              |                 | .767       |          |            | .412               |
| EXH4              |                 | .690       |          |            | .524               |
| CYN1              |                 |            | .749     |            | .439               |
| CYN2              |                 |            | .857     |            | .266               |
| CYN3              |                 |            | .760     |            | .423               |
| INA1              |                 |            |          | .586       | .657               |
| INA2              |                 |            |          | .773       | .402               |
| INA3              |                 |            |          | .641       | .589               |

*Note.* ENG = schoolwork engagement; EXH = exhaustion; CYN = cynicism; INA = inadequacy.

Error covariances between one pair of successive items measuring engagement were freed: <sup>1</sup> Items ENG1 “At school I am bursting with energy” and ENG2 “I find the schoolwork full of meaning and purpose”.
